# Supplementary material for: Impact of Antibiotic Prophylaxis on Surgical Site Infections in Cardiac Surgery
Source: MDPI journal article supplement (doi:10.3390/antibiotics12010085), 2023-01-04
Supplement: s1 [file s1]

## Article

# IMPACT OF ANTIBIOTIC PROPHYLAXIS ON SURGICAL SITE INFECTIONS IN CARDIAC SURGERY

Christian DE TYMOWSKI<sup>1,2,3,4\*</sup>, Tarek SAHNOUN<sup>1</sup>, Sophie PROVENCHERE<sup>1,8</sup>, Marylou PARA<sup>5,6</sup>, Nicolas DERRE<sup>1</sup>, Pierre MUTUON<sup>7</sup>, Xavier DUVAL<sup>6,8,11</sup>, Nathalie GRALL<sup>9,11</sup>, Bernard IUNG<sup>6,10</sup>, Solen KERNEIS<sup>6,11,12</sup>, Jean-Christophe LUCET<sup>6,11,12</sup>, Philippe MONTRAVERS<sup>1,6,13</sup>

1. Department of Anaesthesiology and Surgical Intensive Care Unit, Groupe Hospitalier Bichat Claude Bernard, DMU PARABOL, Assistance Publique Hôpitaux de Paris, Paris, France
2. Université de Paris, Centre de Recherche sur l'Inflammation, INSERM UMR 1149, CNRS ERL8252, F-75018 Paris, France
3. Université Paris Cité, Laboratory of Excellence, Inflamex, F-75018 Paris, France
4. Department of Immunology, DHU Fire, Assistance Publique de Paris, Hôpital Bichat-Claude Bernard, Paris, France
5. Department of Cardiac Surgery, Groupe Hospitalier Bichat Claude Bernard, Assistance Publique Hôpitaux de Paris, Paris, France
6. Université Paris Cité, UFR Paris Nord, Paris, France
7. Service MSI, Groupe Hospitalier Bichat Claude Bernard, Assistance Publique Hôpitaux de Paris, Paris, France
8. INSERM Clinical Investigation Center 1425, Paris, France
9. Service de Bactériologie, Hôpital Bichat Claude Bernard, AP-HP, Université Paris Cité, 75018 Paris, France.
10. AP-HP, Cardiology Department, Bichat Hospital, Université Paris Cité, INSERM 1148, 46 rue Henri Huchard, 75018 Paris, France.
11. Université Paris Cité, Inserm, IAME, F-75018 Paris, France.
12. Infection Control Unit, Bichat-Claude Bernard Hospital, APHP, Paris, France
13. Physiopathologie et Épidémiologie des maladies respiratoires, INSERM UMR 1152, F-75018 Paris, France

**Citation:** Tymowski, C.d.; Sahnoun, T.; Provenchere, S.; Para, M.; Derre, N.; Mutuon, P.; Duval, X.; Grall, N.; Iung, B.; Kernéis, S.; et al. Impact of Antibiotic Prophylaxis on Surgical Site Infections in Cardiac Surgery. *Antibiotics* **2023**, *12*, 85. <https://doi.org/10.3390/antibiotics12010085>

\* Correspondence: christian.detykowski@aphp.fr

Academic Editor: Jeffrey Lipman

Received: 26 November 2022

Revised: 27 December 2022

Accepted: 29 December 2022

Published: 4 January 2023

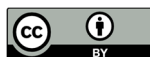

**Copyright:** © 2023 by the authors. Licensee MDPI, Basel, Switzerland. This article is an open access article distributed under the terms and conditions of the Creative Commons Attribution (CC BY) license (<https://creativecommons.org/licenses/by/4.0/>).

**Supplementary Table S1:** Perioperative characteristics of patients according to SSI subtype occurrence

|                                           | WO SSI<br>N = 14,230 (96%) <sup>†</sup> | sSSI<br>N = 389 (2.6%) | dSSI<br>N = 151 (1.0%) | <i>p value</i> |
|-------------------------------------------|-----------------------------------------|------------------------|------------------------|----------------|
| <b>Demography</b>                         |                                         |                        |                        |                |
| Male                                      | 9,879 (69)                              | 234 (60)               | 112 (74)               | <0.001         |
| Age (years)                               | 66 [56-74]                              | 68 [59-75]             | 70 [63-77]             | <0.001         |
| 1 <sup>st</sup> quartile < 56 years       | 3,595 (25)                              | 72 (19)                | 25 (17)                | <0.001         |
| 2 <sup>nd</sup> quartile [56, 65] years   | 3,565 (25)                              | 99 (25)                | 29 (19)                |                |
| 3 <sup>rd</sup> quartile [66-74] years    | 3,533 (25)                              | 111 (29)               | 47 (31)                |                |
| 4 <sup>th</sup> quartile >74 years        | 3,537 (25)                              | 107 (28)               | 50 (33)                |                |
| BMI (kg/m <sup>2</sup> )                  | 26.1 [23.5-29.4]                        | 29.1 [25.8-32.7]       | 27.8 [24.9-31.5]       | <0.001         |
| Obesity                                   | 3,051 (22)                              | 169 (44)               | 55 (36)                | <0.001         |
| <b>Medical history</b>                    |                                         |                        |                        |                |
| Smoking                                   | 5,102 (36)                              | 130 (33)               | 67 (44)                | 0.056          |
| Arterial hypertension                     | 8,258 (58)                              | 304 (78)               | 113 (75)               | <0.001         |
| Diabetes mellitus                         | 3,721 (26)                              | 249 (64)               | 66 (44)                | <0.001         |
| Insulin-dependent diabetes                | 1,096 (7.7)                             | 125 (32)               | 24 (16)                | <0.001         |
| Non insulin-dependent diabetes            | 2,621 (18)                              | 124 (32)               | 42 (28)                | <0.001         |
| Dyslipidaemia                             | 7,084 (50)                              | 259 (67)               | 89 (59)                | <0.001         |
| Chronic peripheral arterial insufficiency | 1,659 (12)                              | 103 (26)               | 39 (26)                | <0.001         |
| Neurovascular stroke                      | 1,283 (9.0)                             | 40 (10)                | 10 (6.6)               | 0.404          |
| Cardiac insufficiency                     | 631 (4.4)                               | 22 (5.7)               | 17 (11)                | <0.001         |
| Ischaemic heart disease                   | 6,953 (49)                              | 331 (85)               | 104 (69)               | <0.001         |
| ESRD                                      | 173 (1.2)                               | 13 (3.3)               | 5 (3.3)                | <0.001         |
| COPD                                      | 1,137 (8.0)                             | 45 (12)                | 29 (19)                | <0.001         |
| Cirrhosis                                 | 144 (1.0)                               | 2 (0.5)                | 2 (1.3)                | 0.535          |
| <b>Preoperative data</b>                  |                                         |                        |                        |                |
| B-blocker                                 | 8,238 (58)                              | 289 (74)               | 93 (62)                | <0.001         |
| Angiotensin-converting enzyme inhibitors  | 6,865 (48)                              | 235 (60)               | 84 (56)                | <0.001         |
| Statins                                   | 8,072 (57)                              | 305 (78)               | 97 (64)                | <0.001         |
| Antiplatelet agent                        | 8,008 (56)                              | 314 (81)               | 108 (72)               | <0.001         |
| Aortic regurgitation                      | 1,449 (10)                              | 13 (3.3)               | 10 (6.6)               | <0.001         |
| Mitral regurgitation                      | 1,771 (12)                              | 13 (3.3)               | 10 (6.6)               | <0.001         |
| Aortic stenosis                           | 3,589 (25)                              | 42 (11)                | 33 (22)                | <0.001         |
| Mitral stenosis                           | 1,022 (7.2)                             | 10 (2.6)               | 6 (4.0)                | <0.001         |
| Surgical emergency                        | 1,050 (7.4)                             | 29 (7.5)               | 21 (14)                | 0.010          |
| Acute infective endocarditis              | 751 (5.3)                               | 4 (1.0)                | 4 (2.6)                | <0.001         |
| Prior cardiac surgery                     | 1,314 (9.2)                             | 18 (4.6)               | 13 (8.6)               | 0.008          |
| Preoperative critical state               | 519 (3.6)                               | 13 (3.3)               | 10 (6.6)               | 0.145          |
| Preoperative MV                           | 249 (1.7)                               | 5 (1.3)                | 5 (3.3)                | 0.290          |
| Preoperative catecholamine                | 301 (2.1)                               | 6 (1.5)                | 5 (3.3)                | 0.382          |

|                                           |                  |                  |                  |        |
|-------------------------------------------|------------------|------------------|------------------|--------|
| Preoperative AKI                          | 218 (1.5)        | 1 (0.3)          | 3 (2.0)          | 0.063  |
| Preoperative haemoglobin (g/dl)           | 13.4 [12.1-14.5] | 13.0 [11.8-14.2] | 12.8 [11.7-14.2] | <0.001 |
| Preoperative platelet count (G/l)         | 220 [182-266]    | 233 [190-283]    | 213 [180-274]    | 0.005  |
| Preoperative prothombin ratio (%)         | 93 [82-100]      | 94 [84-100]      | 88 [77-100]      | 0.003  |
| Preoperative creatinin (µg/l)             | 88 [75-107]      | 90 [74-116]      | 98 [84-120]      | <0.001 |
| Euroscore                                 | 2 [1-5]          | 2 [1-4]          | 3 [2-6]          | <0.001 |
| <b>Intraoperative data</b>                |                  |                  |                  |        |
| VGA                                       | 1,720 (12)       | 33 (8.5)         | 21 (14)          | 0.075  |
| ACC time                                  | 47 [36-66]       | 40 [33-52]       | 47 [36-63]       | <0.001 |
| CB time                                   | 60 [46-86]       | 49 [42-65]       | 59 [46-90]       | <0.001 |
| Isolated CABG                             | 5,343 (38)       | 295 (76)         | 77 (51)          | <0.001 |
| Bimammary artery bypass                   | 5,374 (38)       | 294 (76)         | 86 (57)          | <0.001 |
| CABG and valve surgery                    | 1,319 (9.3)      | 34 (8.7)         | 27 (18)          | <0.001 |
| Isolated valvular surgery                 | 5,721 (40)       | 43 (11)          | 30 (20)          | <0.001 |
| Thoracic aortic surgery                   | 1,486 (10)       | 15 (3.9)         | 7 (4.6)          | <0.001 |
| Cardiac transplantation                   | 202 (1.4)        | 3 (0.8)          | 9 (6.0)          | <0.001 |
| Post bypass catecholamine                 | 5,301 (37)       | 169 (43)         | 69 (46)          | 0.005  |
| Post bypass norepinephrine                | 1,790 (13)       | 47 (12)          | 12 (7.9)         | 0.223  |
| Post bypass norepinephrine and dobutamine | 1,168 (8.2)      | 48 (12)          | 13 (8.6)         | 0.014  |
| <b>Postoperative data</b>                 |                  |                  |                  |        |
| MV duration (hours)                       | 6 [5-10]         | 7 [5-12]         | 8 [6-26]         | <0.001 |
| Catecholamine duration (hours)            | 26 [10-56]       | 38 [14-74]       | 46 [18-84]       | <0.001 |
| Blood loss at 24 H (ml)                   | 535 [380-740]    | 580 [428-790]    | 670 [480-1,000]  | <0.001 |
| Total blood loss (ml)                     | 670 [480-945]    | 760 [570-980]    | 855 [571-1,392]  | <0.001 |
| Postoperative reintervention              | 363 (2.6)        | 389 (100)        | 151 (100)        | <0.001 |
| Surgical site infection                   | 0 (0)            | 389 (100)        | 151 (100)        | <0.001 |
| Superficial SSI                           | 0 (0)            | 389 (100)        | 0 (0)            | <0.001 |
| Deep SSI                                  | 0 (0)            | 0 (0)            | 151 (100)        | <0.001 |
| ICU LOS (days)                            | 3 [2-5]          | 4 [2-8]          | 7 [3-23]         | <0.001 |
| Total LOS (days)                          | 11 [8-16]        | 30 [10-43]       | 38 [23-58]       | <0.001 |
| D28 mortality                             | 573 (4.0)        | 6 (1.5)          | 10 (6.6)         | 0.012  |
| D90 mortality                             | 750 (5.3)        | 25 (6.4)         | 27 (18)          | <0.001 |

Continuous variables are expressed as the median and interquartile range (IQR) and were compared using the Mann–Whitney U test. Categorical variables are expressed as n (%) and were compared with Fisher’s exact test.

BMI, body mass index; CABG, coronary artery bypass graft; CB, cardiopulmonary bypass; COPD, chronic obstructive pulmonary disease; ESRD, end-stage renal disease; ICU, intensive care unit; LOS, length of stay; MV, mechanical ventilation; SSI, surgical site infection; dSSI, deep SSI; sSSI, superficial SSI; VGA, vancomycin/gentamicin antibiotic prophylaxis.

**Supplementary Table S2:** Multivariate analysis of risk factors for superficial and deep SSI

| Predictors                                | Superficial SSI |                    |                  | Deep SSI  |              |                  |
|-------------------------------------------|-----------------|--------------------|------------------|-----------|--------------|------------------|
|                                           | Estimate        | CI                 | p                | Estimates | CI           | p                |
| Male                                      | 0.40            | 0.31 – 0.50        | <b>&lt;0.001</b> | 1.01      | 0.68 – 1.51  | 0.942            |
| Age (years)                               |                 |                    |                  |           |              |                  |
| 1 <sup>st</sup> quartile <56 y            | ref             | ref                | -                | ref       | ref          | -                |
| 2 <sup>nd</sup> quartile [56, 65] y       | 0.76            | 0.54 – 1.06        | 0.102            | 0.92      | 0.52 – 1.63  | 0.769            |
| 3 <sup>rd</sup> quartile [66–74] y        | 0.85            | 0.61 – 1.17        | 0.310            | 1.61      | 0.95 – 2.72  | 0.077            |
| 4 <sup>th</sup> quartile >74 y            | 1.02            | 0.73 – 1.41        | 0.922            | 2.12      | 1.25 – 3.61  | <b>0.005</b>     |
| Obesity                                   | 2.27            | 1.82 – 2.83        | <b>&lt;0.001</b> | 1.96      | 1.38 – 2.79  | <b>&lt;0.001</b> |
| Insulin-dependent diabetes                | 4.27            | 3.23 – 5.64        | <b>&lt;0.001</b> | 1.59      | 0.97 – 2.58  | 0.064            |
| Noninsulin-dependent diabetes             | 2.24            | 1.72 – 2.93        | <b>&lt;0.001</b> | 1.26      | 0.84 – 1.89  | 0.268            |
| Dyslipidaemia                             | 0.81            | 0.64 – 1.04        | 0.094            | 0.87      | 0.61 – 1.26  | 0.463            |
| Chronic peripheral arterial insufficiency | 1.63            | 1.26 – 2.10        | <b>&lt;0.001</b> | 1.69      | 1.13 – 2.51  | <b>0.010</b>     |
| Cardiac insufficiency                     | 0.93            | 0.56 – 1.55        | 0.781            | 1.67      | 0.87 – 3.19  | 0.125            |
| ESRD                                      | 2.00            | 1.06 – 3.78        | <b>0.033</b>     | 1.73      | 0.61 – 4.89  | 0.298            |
| COPB                                      | 1.24            | 0.88 – 1.75        | 0.223            | 2.22      | 1.45 – 3.39  | <b>&lt;0.001</b> |
| Acute infective endocarditis              | 0.62            | 0.22 – 1.76        | 0.368            | 0.52      | 0.15 – 1.79  | 0.304            |
| Prior cardiac surgery                     | 1.55            | 0.89 – 2.71        | 0.121            | 1.40      | 0.72 – 2.73  | 0.324            |
| CPB time (/10 min)                        | 0.96            | 0.92 – 1.00        | 0.052            | 1.06      | 1.01 – 1.10  | <b>0.009</b>     |
| CABG                                      | 2.86            | 1.79 – 4.58        | <b>&lt;0.001</b> | 2.14      | 1.17 – 3.91  | <b>0.013</b>     |
| Bimammary artery bypass                   | 2.24            | 1.50 – 3.34        | <b>&lt;0.001</b> | 1.34      | 0.78 – 2.31  | 0.293            |
| Cardiac transplantation                   | 1.03            | 0.23 – 4.60        | 0.964            | 8.48      | 3.22 – 22.31 | <b>&lt;0.001</b> |
| Post-bypass norepinephrine and dobutamine | 2.56            | 1.79 – 3.67        | <b>&lt;0.001</b> | 0.54      | 0.27 – 1.10  | 0.089            |
| <b>VGA</b>                                | <b>0.84</b>     | <b>0.57 – 1.24</b> | <b>0.386</b>     | 1.22      | 0.73 – 2.02  | 0.444            |

CABG, coronary artery bypass graft; CB, cardiopulmonary bypass; COPD, chronic obstructive pulmonary disease; ESRD, end-stage renal disease; SSI, surgical site infection, VGA, vancomycin gentamicin antibiotic prophylaxis.

**Supplementary Table S3:** Multivariate analysis of risk factors for superficial and deep SSI in the propensity score analysis

| Predictors                                | Superficial SSI |             |        | Deep SSI  |              |        |
|-------------------------------------------|-----------------|-------------|--------|-----------|--------------|--------|
|                                           | Estimate        | CI          | p      | Estimates | CI           | p      |
| Male                                      | 0.51            | 0.40 – 0.65 | <0.001 | 2.00      | 1.24 – 3.24  | 0.004  |
| Age (years)                               |                 |             |        |           |              |        |
| 1 <sup>st</sup> quartile < 56 y           | ref             | ref         | -      | ref       | ref          | -      |
| 2 <sup>nd</sup> quartile [56, 65] y       | 0.94            | 0.67 – 1.32 | 0.727  | 0.47      | 0.28 – 0.78  | 0.004  |
| 3 <sup>rd</sup> quartile [66–74] y        | 1.15            | 0.82 – 1.61 | 0.418  | 0.68      | 0.41 – 1.12  | 0.132  |
| 4 <sup>th</sup> quartile >74 y            | 1.03            | 0.72 – 1.49 | 0.860  | 0.33      | 0.16 – 0.69  | 0.003  |
| Obesity                                   | 2.76            | 2.18 – 3.49 | <0.001 | 5.90      | 4.05 – 8.58  | <0.001 |
| Insulin-dependent diabetes                | 3.24            | 2.38 – 4.42 | <0.001 | 1.46      | 0.73 – 2.92  | 0.287  |
| Noninsulin-dependent diabetes             | 1.90            | 1.43 – 2.52 | <0.001 | 0.98      | 0.56 – 1.71  | 0.949  |
| Dyslipidaemia                             | 0.57            | 0.44 – 0.74 | <0.001 | 0.18      | 0.10 – 0.31  | <0.001 |
| Chronic peripheral arterial insufficiency | 1.33            | 0.98 – 1.81 | 0.064  | 1.38      | 0.73 – 2.63  | 0.321  |
| Cardiac insufficiency                     | 0.98            | 0.58 – 1.66 | 0.939  | 3.75      | 1.89 – 7.45  | <0.001 |
| ESRD                                      | 4.73            | 3.18 – 7.03 | <0.001 | 4.27      | 2.27 – 8.02  | <0.001 |
| COPB                                      | 1.91            | 1.41 – 2.57 | <0.001 | 0.59      | 0.28 – 1.22  | 0.152  |
| Acute infective endocarditis              | 0.98            | 0.67 – 1.43 | 0.921  | 4.05      | 2.52 – 6.49  | <0.001 |
| Prior cardiac surgery                     | 1.04            | 0.67 – 1.61 | 0.850  | 2.14      | 1.34 – 3.41  | 0.001  |
| CB time (/10 min)                         | 0.96            | 0.93 – 0.99 | 0.004  | 0.99      | 0.95 – 1.03  | 0.691  |
| CABG                                      | 3.48            | 2.27 – 5.32 | <0.001 | 0.68      | 0.19 – 2.43  | 0.556  |
| Bimammary artery bypass                   | 1.55            | 1.04 – 2.31 | 0.030  | 4.29      | 1.14 – 16.18 | 0.031  |
| Cardiac transplantation                   | 0.80            | 0.34 – 1.89 | 0.608  | 2.49      | 1.05 – 5.90  | 0.039  |
| Post-bypass norepinephrine and dobutamine | 2.74            | 2.06 – 3.63 | <0.001 | 0.40      | 0.23 – 0.69  | 0.001  |
| VGA                                       | 0.76            | 0.52 – 1.11 | 0.150  | 1.28      | 0.77 – 2.15  | 0.339  |

CABG, coronary artery bypass graft; CB, cardiopulmonary bypass; COPD, chronic obstructive pulmonary disease; ESRD, end-stage renal disease; SSI, surgical site infection; VGA, vancomycin gentamicin antibiotic prophylaxis.

**Supplementary Table S4:** Perioperative characteristics of patients according to the type of prophylaxis in the sensibility analysis excluding patients with active endocarditis

|                                           | Overall<br>N = 14,011<br>(100%) | CA<br>N = 12,711<br>(91%) | VGA<br>N = 1,300 (9%) | <i>p</i> value |
|-------------------------------------------|---------------------------------|---------------------------|-----------------------|----------------|
| <b>Demography</b>                         |                                 |                           |                       |                |
| Male                                      | 9,662 (69)                      | 8,940 (70)                | 722 (56)              | <0.001         |
| Age (years)                               | 66 [57-74]                      | 66 [57-74]                | 66 [56-75]            | 0.833          |
| 1 <sup>st</sup> quartile < 56 years       | 3,391 (24)                      | 3,053 (24)                | 338 (26)              | 0.246          |
| 2 <sup>nd</sup> quartile [56, 65] years   | 3,499 (25)                      | 3,190 (25)                | 309 (24)              |                |
| 3 <sup>rd</sup> quartile [66-74] years    | 3,544 (25)                      | 3,233 (25)                | 311 (24)              |                |
| 4 <sup>th</sup> quartile >74 years        | 3,577 (26)                      | 3,235 (25)                | 342 (26)              | 0.195          |
| BMI (kg/m <sup>2</sup> )                  | 26.3 [23.7-29.4]                | 26.3 [23.7-29.4]          | 26.1 [23.3-29.6]      |                |
| Obesity                                   | 3,153 (23)                      | 2,847 (23)                | 306 (24)              | 0.377          |
| <b>Medical history</b>                    |                                 |                           |                       |                |
| Smoking                                   | 5,049 (36)                      | 4,577 (36)                | 472 (36)              | 0.830          |
| Arterial hypertension                     | 8,349 (60)                      | 7,608 (60)                | 741 (57)              | 0.046          |
| Diabetes mellitus                         | 3,909 (28)                      | 3,547 (28)                | 362 (28)              | 0.964          |
| Insulin-dependent diabetes                | 1,194 (8.5)                     | 1,067 (8.4)               | 127 (9.8)             | 0.091          |
| Noninsulin-dependent diabetes             | 2,711 (19)                      | 2,477 (19)                | 234 (18)              | 0.196          |
| Dyslipidaemia                             | 7,240 (52)                      | 6,638 (52)                | 602 (46)              | <0.001         |
| Chronic peripheral arterial insufficiency | 1,730 (12)                      | 1,572 (12)                | 158 (12)              | 0.824          |
| Stroke                                    | 1,136 (8.1)                     | 996 (7.8)                 | 140 (11)              | <0.001         |
| Cardiac insufficiency                     | 654 (4.7)                       | 549 (4.3)                 | 105 (8.1)             | <0.001         |
| Ischaemic heart disease                   | 7,313 (52)                      | 6,798 (53)                | 515 (40)              | <0.001         |
| ESRD                                      | 156 (1.1)                       | 115 (0.9)                 | 41 (3.2)              | <0.001         |
| COPD                                      | 1,145 (8.2)                     | 985 (7.7)                 | 160 (12)              | <0.001         |
| Cirrhosis                                 | 113 (0.8)                       | 91 (0.7)                  | 22 (1.7)              | <0.001         |
| <b>Preoperative data</b>                  |                                 |                           |                       |                |
| B-blocker                                 | 8,465 (60)                      | 7,790 (61)                | 675 (52)              | <0.001         |
| ACE inhibitor                             | 7,018 (50)                      | 6,398 (50)                | 620 (48)              | 0.070          |
| Statins                                   | 8,312 (59)                      | 7,650 (60)                | 662 (51)              | <0.001         |
| Antiplatelet agent                        | 8,266 (59)                      | 7,636 (60)                | 630 (48)              | <0.001         |
| Aortic regurgitation                      | 1,114 (8.0)                     | 968 (7.6)                 | 146 (11)              | <0.001         |
| Mitral regurgitation                      | 1,577 (11)                      | 1,342 (11)                | 235 (18)              | <0.001         |
| Aortic Stenosis                           | 3,622 (26)                      | 3,244 (26)                | 378 (29)              | 0.005          |
| Mitral stenosis                           | 1,012 (7.2)                     | 887 (7.0)                 | 125 (9.6)             | <0.001         |
| Surgical emergency                        | 930 (6.6)                       | 802 (6.3)                 | 128 (9.8)             | <0.001         |
| Acute infective endocarditis              | 0 (0)                           | 0 (0)                     | 0 (0)                 |                |
| Prior cardiac surgery                     | 1,126 (8.0)                     | 927 (7.3)                 | 199 (15)              | <0.001         |
| Preoperative critical state               | 371 (2.6)                       | 277 (2.2)                 | 94 (7.2)              | <0.001         |
| MV                                        | 145 (1.0)                       | 91 (0.7)                  | 54 (4.2)              | <0.001         |
| Catecholamine                             | 209 (1.5)                       | 151 (1.2)                 | 58 (4.5)              | <0.001         |

|                                                |                  |                  |                  |        |
|------------------------------------------------|------------------|------------------|------------------|--------|
| AKI                                            | 125 (0.9)        | 79 (0.6)         | 46 (3.5)         | <0.001 |
| Haemoglobin (g/dl)                             | 13.5 [12.3-14.6] | 13.6 [12.4-14.6] | 12.8 [11.4-14.0] | <0.001 |
| Platelet count (G/l)                           | 220 [183-265]    | 219 [182-264]    | 226 [186-276]    | 0.002  |
| Prothombin ratio (%)                           | 94 [83-100]      | 94 [84-100]      | 92 [80-100]      | <0.001 |
| Creatinin (µg/L)                               | 88 [75-106]      | 88 [75-106]      | 89 [75-114]      | 0.004  |
| EuroSCORE II                                   | 2 [1-4]          | 2 [1-4]          | 3 [2-7]          | <0.001 |
| <b>Intraoperative data</b>                     |                  |                  |                  |        |
| ACC time                                       | 46 [36-64]       | 45 [36-64]       | 50 [37-71]       | <0.001 |
| CBP time                                       | 58 [46-83]       | 58 [45-82]       | 66 [48-97]       | <0.001 |
| Isolated CABG                                  | 5,714 (41)       | 5,387 (42)       | 327 (25)         | <0.001 |
| Bimammary artery bypass                        | 5,740 (41)       | 5,387 (42)       | 353 (27)         | <0.001 |
| CABG and valve surgery                         | 1,323 (9.4)      | 1,175 (9.2)      | 148 (11)         | 0.012  |
| Isolated valvular surgery                      | 5,176 (37)       | 4,564 (36)       | 612 (47)         | <0.001 |
| Thoracic aortic surgery                        | 1,430 (10)       | 1,306 (10)       | 124 (9.5)        | 0.404  |
| Cardiac transplantation                        | 211 (1.5)        | 155 (1.2)        | 56 (4.3)         | <0.001 |
| Post-bypass catechola-<br>mine                 | 5,073 (36)       | 4,504 (35)       | 569 (44)         | <0.001 |
| Post-bypass norepineph-<br>rine                | 1,724 (12)       | 1,625 (13)       | 99 (7.6)         | <0.001 |
| Post-bypass norepineph-<br>rine and dobutamine | 1,068 (7.6)      | 927 (7.3)        | 141 (11)         | <0.001 |
| <b>Postoperative data</b>                      |                  |                  |                  |        |
| MV duration (hours)                            | 6 [5-9]          | 6 [5-9]          | 7 [5-12]         | <0.001 |
| Catecholamine duration<br>(hours)              | 25 [10-54]       | 24 [10-51]       | 34 [16-72]       | <0.001 |
| Blood loss at 24 H (ml)                        | 540 [390-750]    | 545 [390-750]    | 482 [340-700]    | <0.001 |
| Total blood loss (ml)                          | 680 [480-950]    | 680 [490-950]    | 630 [430-890]    | <0.001 |
| Reintervention                                 | 865 (6.2)        | 782 (6.2)        | 83 (6.4)         | 0.740  |
| Surgical site infection                        | 532 (3.8)        | 480 (3.8)        | 52 (4.0)         | 0.688  |
| Superficial SSI                                | 385 (2.7)        | 353 (2.8)        | 32 (2.5)         | 0.507  |
| Deep SSI                                       | 147 (1.0)        | 127 (1.0)        | 20 (1.5)         | 0.069  |
| ICU LOS (days)                                 | 3 [2-5]          | 3 [2-5]          | 4 [2-6]          | <0.001 |
| Total LOS (days)                               | 11 [8-16]        | 10 [8-15]        | 13 [8-20]        | <0.001 |
| D28 mortality                                  | 477 (3.4)        | 410 (3.2)        | 67 (5.2)         | <0.001 |
| D90 mortality                                  | 655 (4.7)        | 559 (4.4)        | 96 (7.4)         | <0.001 |

**Supplementary Table S5:** Multivariate analysis of risk factors for superficial and deep SSI in the sensitivity analysis excluding active endocarditis

| Predictors                                | Superficial SSI |             |                  | Deep SSI  |              |                  |
|-------------------------------------------|-----------------|-------------|------------------|-----------|--------------|------------------|
|                                           | Estimate        | CI          | p                | Estimates | CI           | p                |
| Male                                      | 0.41            | 0.32 – 0.52 | <b>&lt;0.001</b> | 1.08      | 0.71 – 1.62  | 0.728            |
| Age (years)                               |                 |             |                  |           |              |                  |
| 1 <sup>st</sup> quartile < 56 y           | ref             | ref         | -                | ref       | ref          | -                |
| 2 <sup>nd</sup> quartile [56, 65] y       | 0.75            | 0.54 – 1.05 | 0.089            | 0.99      | 0.55 – 1.78  | 0.975            |
| 3 <sup>rd</sup> quartile [66–74] y        | 0.84            | 0.61 – 1.17 | 0.303            | 1.68      | 0.98 – 2.90  | 0.061            |
| 4 <sup>th</sup> quartile >74 y            | 1.03            | 0.74 – 1.43 | 0.871            | 2.27      | 1.32 – 3.92  | <b>0.003</b>     |
| Obesity                                   | 2.23            | 1.78 – 2.79 | <b>&lt;0.001</b> | 1.88      | 1.32 – 2.69  | <b>0.001</b>     |
| Insulin-dependent diabetes                | 4.33            | 3.27 – 5.73 | <b>&lt;0.001</b> | 1.65      | 1.01 – 2.69  | <b>0.045</b>     |
| Noninsulin-dependent diabetes             | 2.22            | 1.70 – 2.90 | <b>&lt;0.001</b> | 1.29      | 0.86 – 1.93  | 0.226            |
| Dyslipidaemia                             | 0.82            | 0.64 – 1.05 | 0.113            | 0.90      | 0.62 – 1.30  | 0.569            |
| Chronic peripheral arterial insufficiency | 1.64            | 1.27 – 2.12 | <b>&lt;0.001</b> | 1.71      | 1.14 – 2.54  | <b>0.009</b>     |
| Cardiac insufficiency                     | 0.95            | 0.57 – 1.58 | 0.838            | 1.47      | 0.75 – 2.88  | 0.267            |
| ESRD                                      | 1.89            | 0.98 – 3.66 | 0.058            | 1.30      | 0.40 – 4.26  | 0.662            |
| COPB                                      | 1.25            | 0.88 – 1.77 | 0.207            | 2.27      | 1.48 – 3.47  | <b>&lt;0.001</b> |
| Prior cardiac surgery                     | 1.58            | 0.89 – 2.79 | 0.116            | 1.37      | 0.69 – 2.71  | 0.368            |
| CB time (/10 min)                         | 0.96            | 0.92 – 1.00 | 0.073            | 1.07      | 1.02 – 1.11  | <b>0.002</b>     |
| CABG                                      | 2.77            | 1.72 – 4.48 | <b>&lt;0.001</b> | 2.19      | 1.19 – 4.02  | <b>0.012</b>     |
| Bimammary artery bypass                   | 2.28            | 1.52 – 3.42 | <b>&lt;0.001</b> | 1.34      | 0.78 – 2.32  | 0.292            |
| Cardiac transplantation                   | 1.03            | 0.23 – 4.60 | 0.968            | 8.69      | 3.27 – 23.07 | <b>&lt;0.001</b> |
| Post-bypass norepinephrine and dobutamine | 2.42            | 1.68 – 3.50 | <b>&lt;0.001</b> | 0.58      | 0.28 – 1.18  | 0.130            |
| VGA                                       | 0.89            | 0.60 – 1.32 | 0.566            | 1.41      | 0.86 – 2.31  | 0.177            |

CABG, coronary artery bypass graft; CB, cardiopulmonary bypass; COPD, chronic obstructive pulmonary disease; ESRD, end-stage renal disease; SSI, surgical site infection; VGA, vancomycin gentamicin antibiotic prophylaxis.



**Supplementary Table S6:** Perioperative characteristics of patients according to the type of prophylaxis in the sensibility analysis restricted to patients with isolated CABG

|                                           | Overall<br>N = 5,715 (100%) | CA<br>N = 5,387 (94%) | VGA<br>N = 328 (6%) | <i>p value</i> |
|-------------------------------------------|-----------------------------|-----------------------|---------------------|----------------|
| <b>Demography</b>                         |                             |                       |                     |                |
| Male                                      | 4,831 (85)                  | 4,598 (85)            | 233 (71)            | <0.001         |
| Age (years)                               | 66 [58-73]                  | 66 [58-73]            | 67 [60-74]          | 0.054          |
| 1 <sup>st</sup> quartile < 56 years       | 1,096 (19)                  | 1,040 (19)            | 56 (17)             | 0.492          |
| 2 <sup>nd</sup> quartile [56, 65] years   | 1,747 (31)                  | 1,653 (31)            | 94 (29)             |                |
| 3 <sup>rd</sup> quartile [66-74] years    | 1,673 (29)                  | 1,571 (29)            | 102 (31)            |                |
| 4 <sup>th</sup> quartile >74 years        | 1,199 (21)                  | 1,123 (21)            | 76 (23)             |                |
| BMI (kg/m <sup>2</sup> )                  | 26.9 [24.4-29.9]            | 26.9 [24.4-29.8]      | 27.4 [24.4-30.2]    | 0.292          |
| Obesity                                   | 1,417 (25)                  | 1,328 (25)            | 89 (27)             | 0.329          |
| <b>Medical history</b>                    |                             |                       |                     |                |
| Smoking                                   | 2,537 (44)                  | 2,379 (44)            | 158 (48)            | 0.156          |
| Arterial hypertension                     | 4,073 (71)                  | 3,821 (71)            | 252 (77)            | 0.022          |
| Diabetes mellitus                         | 2,404 (42)                  | 2,259 (42)            | 145 (44)            | 0.418          |
| Insulin-dependent diabetes                | 817 (14)                    | 755 (14)              | 62 (19)             | 0.014          |
| Noninsulin-dependent diabetes             | 1,584 (28)                  | 1,502 (28)            | 82 (25)             | 0.258          |
| Dyslipidaemia                             | 4,164 (73)                  | 3,922 (73)            | 242 (74)            | 0.700          |
| Chronic peripheral arterial insufficiency | 1,117 (20)                  | 1,046 (19)            | 71 (22)             | 0.323          |
| Stroke                                    | 399 (7.0)                   | 371 (6.9)             | 28 (8.5)            | 0.255          |
| Cardiac insufficiency                     | 283 (5.0)                   | 262 (4.9)             | 21 (6.4)            | 0.212          |
| Ischaemic heart disease                   | 5,707 (100)                 | 5,379 (100)           | 328 (100)           | >0.999         |
| ESRD                                      | 71 (1.2)                    | 60 (1.1)              | 11 (3.4)            | 0.002          |
| COPD                                      | 457 (8.0)                   | 409 (7.6)             | 48 (15)             | <0.001         |
| Cirrhosis                                 | 29 (0.5)                    | 27 (0.5)              | 2 (0.6)             | 0.682          |
| <b>Preoperative data</b>                  |                             |                       |                     |                |
| B-blocker                                 | 4,699 (82)                  | 4,436 (82)            | 263 (80)            | 0.320          |
| ACE inhibitor                             | 3,488 (61)                  | 3,291 (61)            | 197 (60)            | 0.710          |
| Statins                                   | 5,036 (88)                  | 4,749 (88)            | 287 (88)            | 0.721          |
| Antiplatelet agent                        | 5,402 (95)                  | 5,095 (95)            | 307 (94)            | 0.448          |
| Aortic regurgitation                      | 11 (0.2)                    | 11 (0.2)              | 0 (0)               | >0.999         |
| Mitral regurgitation                      | 14 (0.2)                    | 14 (0.3)              | 0 (0)               | >0.999         |
| Aortic Stenosis                           | 38 (0.7)                    | 33 (0.6)              | 5 (1.5)             | 0.064          |
| Mitral stenosis                           | 3 (<0.1)                    | 3 (<0.1)              | 0 (0)               | >0.999         |
| Surgical emergency                        | 227 (4.0)                   | 208 (3.9)             | 19 (5.8)            | 0.082          |
| Acute infective endocarditis              | 1 (<0.1)                    | 0 (0)                 | 1 (0.3)             | 0.057          |
| Prior cardiac surgery                     | 49 (0.9)                    | 44 (0.8)              | 5 (1.5)             | 0.202          |
| Preoperative critical state               |                             |                       |                     |                |
| MV                                        | 10 (0.2)                    | 10 (0.2)              | 0 (0)               | >0.999         |
| Catecholamine                             | 24 (0.4)                    | 24 (0.4)              | 0 (0)               | 0.398          |

|                                                |                  |                  |                  |        |
|------------------------------------------------|------------------|------------------|------------------|--------|
| AKI                                            | 12 (0.2)         | 10 (0.2)         | 2 (0.6)          | 0.148  |
| Haemoglobin (g/dl)                             | 13.8 [12.6-14.8] | 13.8 [12.7-14.8] | 13.2 [11.9-14.3] | <0.001 |
| Platelet count (G/l)                           | 226 [190-271]    | 225 [190-270]    | 238 [196-293]    | 0.002  |
| Prothombin ratio (%)                           | 95 [87-100]      | 95 [87-100]      | 96 [87-100]      | 0.613  |
| Creatinin (µg/L)                               | 89 [76-106]      | 89 [76-105]      | 88 [76-110]      | 0.477  |
| EuroSCORE II                                   | 1 [1-2]          | 1 [1-2]          | 2 [1-3]          | <0.001 |
| <b>Intraoperative data</b>                     | 5,715 (100)      | 5,387 (100)      | 328 (100)        |        |
| ACC time                                       | 38 [32-47]       | 39 [32-47]       | 37 [31-44]       | 0.018  |
| CBP time                                       | 47 [40-56]       | 47 [40-57]       | 46 [38-53]       | 0.027  |
| Isolated CABG                                  | 5,715 (100)      | 5,387 (100)      | 328 (100)        |        |
| Bimammary artery bypass                        | 5,206 (91)       | 4,907 (91)       | 299 (91)         | 0.966  |
| CABG and valve surgery                         | 0 (0)            | 0 (0)            | 0 (0)            |        |
| Isolated valvular surgery                      | 0 (0)            | 0 (0)            | 0 (0)            |        |
| Thoracic aortic surgery                        | 0 (0)            | 0 (0)            | 0 (0)            |        |
| Cardiac transplantation                        | 0 (0)            | 0 (0)            | 0 (0)            |        |
| Post-bypass catechola-<br>mine                 | 1,681 (29)       | 1,575 (29)       | 106 (32)         | 0.235  |
| Post-bypass norepineph-<br>rine                | 812 (14)         | 784 (15)         | 28 (8.5)         | 0.002  |
| Post-bypass norepineph-<br>rine and dobutamine | 231 (4.0)        | 216 (4.0)        | 15 (4.6)         | 0.615  |
| <b>Postoperative data</b>                      | 5,715 (100)      | 5,387 (100)      | 328 (100)        |        |
| MV duration (hours)                            | 6 [5-8]          | 6 [5-8]          | 6 [5-9]          | 0.052  |
| Catecholamine duration<br>(hours)              | 24 [7-44]        | 24 [7-43]        | 25 [10-48]       | 0.008  |
| Blood loss at 24 H (ml)                        | 640 [495-810]    | 640 [500-810]    | 560 [440-741]    | <0.001 |
| Total blood loss (ml)                          | 810 [625-1,030]  | 810 [630-1,030]  | 750 [580-950]    | 0.004  |
| Reintervention                                 | 464 (8.1)        | 425 (7.9)        | 39 (12)          | 0.010  |
| Surgical site infection                        | 372 (6.5)        | 340 (6.3)        | 32 (9.8)         | 0.014  |
| Superficial SSI                                | 295 (5.2)        | 270 (5.0)        | 25 (7.6)         | 0.038  |
| Deep SSI                                       | 77 (1.3)         | 70 (1.3)         | 7 (2.1)          | 0.210  |
| ICU LOS (days)                                 | 3 [2-4]          | 3 [2-4]          | 3 [2-5]          | 0.070  |
| Total LOS (days)                               | 8 [7-12]         | 8 [7-12]         | 9 [7-14]         | 0.033  |
| D28 mortality                                  | 101 (1.8)        | 88 (1.6)         | 13 (4.0)         | 0.002  |
| D90 mortality                                  | 154 (2.7)        | 134 (2.5)        | 20 (6.1)         | <0.001 |

**Supplementary Table S7:** Multivariate analysis of risk factors for superficial and deep SSI in the sensitivity analysis restricted to patients undergoing isolated CABG

| Predictors                                | Superficial SSI |             |                  | Deep SSI  |             |                  |
|-------------------------------------------|-----------------|-------------|------------------|-----------|-------------|------------------|
|                                           | Estimate        | CI          | p                | Estimates | CI          | p                |
| Male                                      | 0.32            | 0.25 – 0.42 | <b>&lt;0.001</b> | 0.75      | 0.42 – 1.34 | 0.327            |
| Age (years)                               |                 |             |                  |           |             |                  |
| 1 <sup>st</sup> quartile <56 y            | ref             | ref         | -                | ref       | ref         | -                |
| 2 <sup>nd</sup> quartile [56, 65] y       | 0.80            | 0.55 – 1.17 | 0.254            | 0.84      | 0.35 – 2.06 | 0.706            |
| 3 <sup>rd</sup> quartile [66–74] y        | 0.84            | 0.57 – 1.22 | 0.357            | 1.81      | 0.81 – 4.03 | 0.147            |
| 4 <sup>th</sup> quartile >74 y            | 1.13            | 0.76 – 1.68 | 0.534            | 2.53      | 1.12 – 5.73 | <b>0.026</b>     |
| Obesity                                   | 2.03            | 1.56 – 2.63 | <b>&lt;0.001</b> | 2.52      | 1.55 – 4.10 | <b>&lt;0.001</b> |
| Insulin-dependent diabetes                | 4.27            | 3.09 – 5.91 | <b>&lt;0.001</b> | 1.49      | 0.78 – 2.84 | 0.227            |
| Noninsulin-dependent diabetes             | 2.47            | 1.81 – 3.38 | <b>&lt;0.001</b> | 1.42      | 0.83 – 2.44 | 0.201            |
| Dyslipidaemia                             | 0.99            | 0.73 – 1.33 | 0.922            | 0.81      | 0.48 – 1.38 | 0.447            |
| Chronic peripheral arterial insufficiency | 1.84            | 1.39 – 2.43 | <b>&lt;0.001</b> | 2.44      | 1.50 – 3.99 | <b>&lt;0.001</b> |
| Cardiac insufficiency                     | 1.07            | 0.63 – 1.83 | 0.808            | 1.79      | 0.75 – 4.28 | 0.193            |
| ESRD                                      | 2.26            | 1.10 – 4.63 | <b>0.027</b>     | 0.75      | 0.10 – 5.72 | 0.784            |
| COPB                                      | 1.13            | 0.74 – 1.73 | 0.563            | 2.29      | 1.26 – 4.16 | <b>0.007</b>     |
| Prior cardiac surgery                     | 0.35            | 0.04 – 2.65 | 0.307            | 0.00      | 0.00 – Inf  | 0.980            |
| CB time (/10 min)                         | 0.96            | 0.90 – 1.03 | 0.280            | 1.09      | 0.98 – 1.21 | 0.109            |
| Post-bypass norepinephrine and dobutamine | 3.10            | 1.99 – 4.83 | <b>&lt;0.001</b> | 0.44      | 0.10 – 1.90 | 0.273            |
| <b>VGA</b>                                | 1.22            | 0.77 – 1.93 | 0.395            | 1.40      | 0.62 – 3.16 | 0.417            |

CABG, coronary artery bypass graft; CB, cardiopulmonary bypass; COPD, chronic obstructive pulmonary disease; ESRD, end-stage renal disease; SSI, surgical site infection; VGA, vancomycin gentamicin antibiotic prophylaxis.

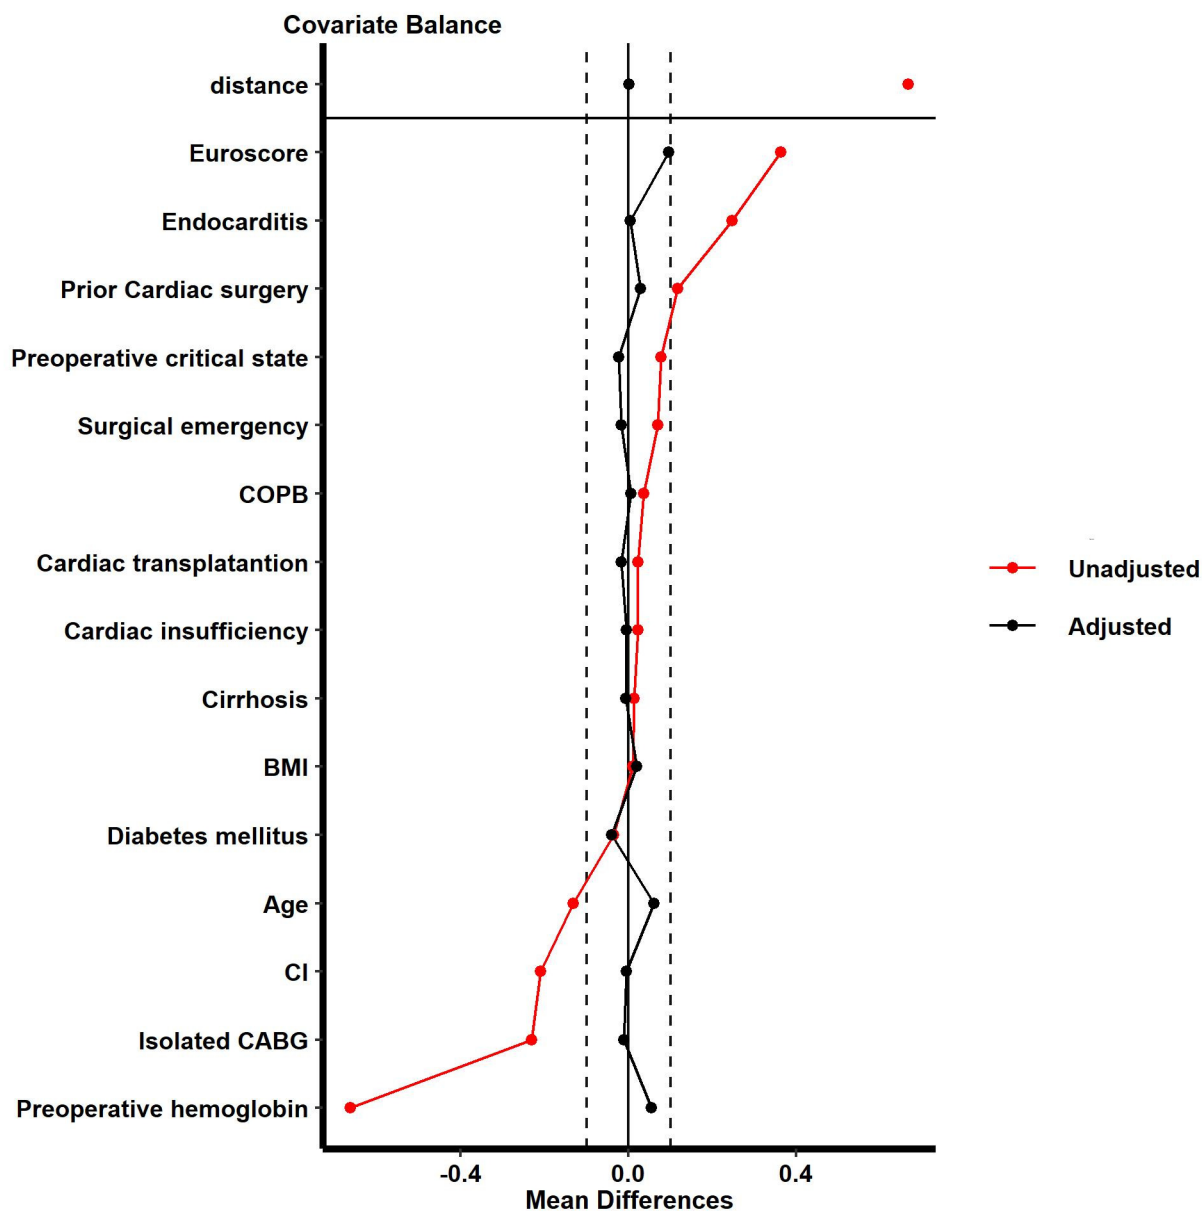

**Supplementary Figure S1:** Covariate balance in the propensity matched samples

Matching was performed using the Matching package[23], and covariate balance was assessed using cobalt[25]. Both packages were implemented in R (R Core Team, 2022).

BMI, body mass index, CABG, coronary artery bypass graft; CI, cardiac insufficiency; COPD, chronic obstructive pulmonary disease.

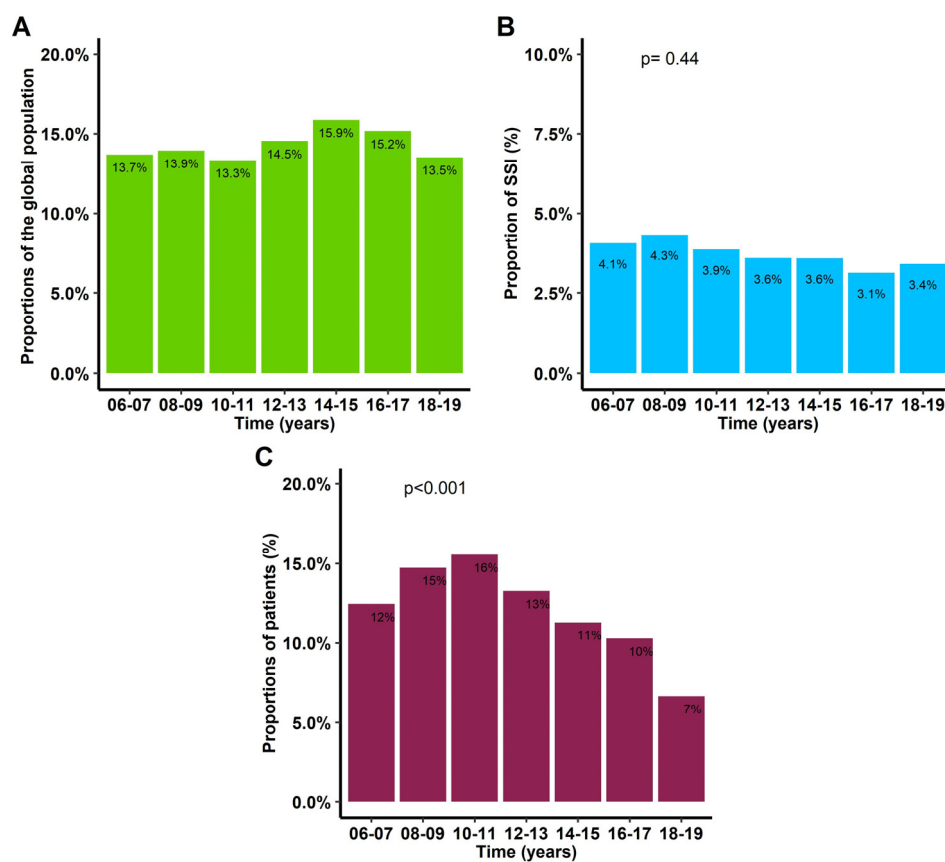

**Supplementary Figure S2:** Characteristics of the patients during the inclusion period

A, Proportion of patients included per two years during the study period.

B, Proportion of patients who presented a surgical site infection within the first 90 days after surgery per two years during the study period.

C, Proportion of patients treated with vancomycin/gentamicin every two years during the study period.

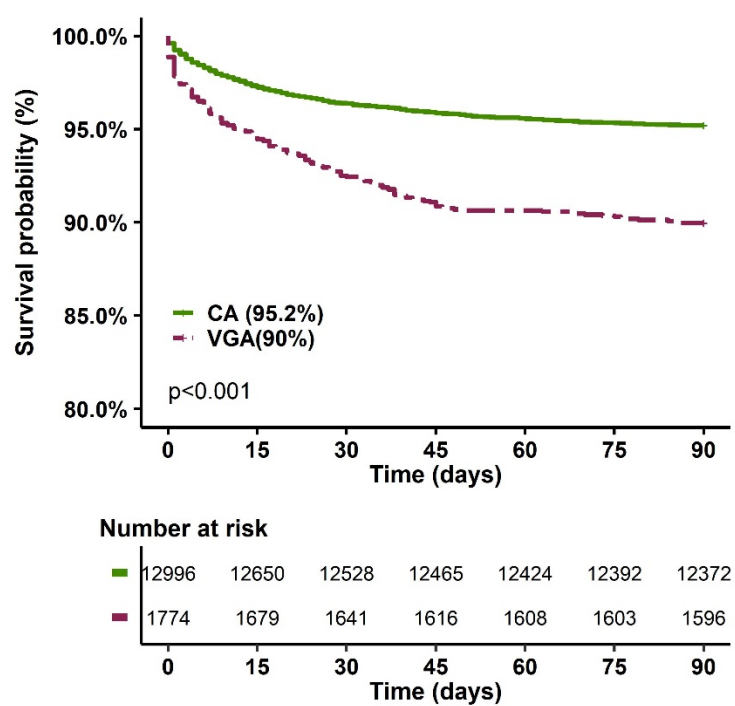

**Supplementary Figure S3:** 90-day mortality according to the type of prophylaxis

CA, cephalosporin antibiotic prophylaxis; VGA, vancomycin/gentamicin antibiotic prophylaxis.
